# Supplementary material
Source: MDPI journal article supplement (https://www.mdpi.com/2673-8929/2/1/6)
Supplement: s1 [file s1]

## Supplemental

### Search Strategy:

| Database                                 | Strategy                                                                                                                                                                                                                                                                                                                                                                                                                                                                                                                                                                                                                                                                                                                                             | Run Date  | Records                                                                   |
|------------------------------------------|------------------------------------------------------------------------------------------------------------------------------------------------------------------------------------------------------------------------------------------------------------------------------------------------------------------------------------------------------------------------------------------------------------------------------------------------------------------------------------------------------------------------------------------------------------------------------------------------------------------------------------------------------------------------------------------------------------------------------------------------------|-----------|---------------------------------------------------------------------------|
| <b>Medline<br/>(OVID)<br/>1946-</b>      | <p>Microplastic* OR nanoplastic* OR micro-plastic* OR nano-plastic* OR Plastic resin OR plastic particulate* OR plastic particle* OR plastic waste OR plastic pollution OR microbead* OR micro-bead*</p> <p>AND</p> <p>Ingest* OR eat OR drink* OR potable water OR bottled water OR water supply OR tap water OR well water OR food supply OR food microbiology OR food contamination OR foods OR crops OR soil OR diet* OR absorb* OR absorption OR air* OR inhalation OR inhale* OR respirat* OR breath* OR lung* OR expos* OR consume* OR consumption OR derma* OR skin OR cosmetic* OR consumer* OR contamination OR concentration OR health OR illness* OR disease*</p> <p>NOT</p> <p>Exp animals/ NOT exp humans/</p>                         | 1/21/2020 | 2297                                                                      |
| <b>Embase<br/>(OVID)<br/>1947-</b>       | <p>Microplastic* OR nanoplastic* OR micro-plastic* OR nano-plastic* OR Plastic resin OR plastic particulate* OR plastic particle* OR plastic waste OR plastic pollution OR microbead* OR micro-bead*</p> <p>AND</p> <p>Ingest* OR eat OR drink* OR potable water OR bottled water OR water supply OR tap water OR well water OR food supply OR food microbiology OR food contamination OR foods OR crops OR soil OR diet* OR absorb* OR absorption OR air* OR inhalation OR inhale* OR respirat* OR breath* OR lung* OR expos* OR consume* OR consumption OR derma* OR skin OR cosmetic* OR consumer* OR contamination OR concentration OR health OR illness* OR disease*</p> <p>NOT</p> <p>Exp animal/ NOT exp human/</p> <p>NOT pubmed/medline</p> | 1/21/2020 | <p>3084</p> <p>-1612<br/>duplicates</p> <p>=1472<br/>unique<br/>items</p> |
| <b>CAB Abstract<br/>(OVID)<br/>1973-</b> | <p>Microplastic* OR nanoplastic* OR micro-plastic* OR nano-plastic* OR Plastic resin OR plastic particulate* OR plastic particle* OR plastic waste OR plastic pollution OR microbead* OR micro-bead*</p> <p>AND</p> <p>Ingest* OR eat OR drink* OR potable water OR bottled water OR water supply OR tap water OR well water OR food supply OR food microbiology OR food contamination OR foods OR crops OR soil OR diet* OR absorb* OR absorption OR air* OR inhalation OR inhale* OR respirat* OR breath* OR lung* OR expos* OR consume* OR consumption OR derma* OR skin OR cosmetic* OR consumer* OR contamination OR concentration OR health OR illness* OR disease*</p>                                                                        | 1/21/2020 | <p>1654</p> <p>-759<br/>duplicates</p> <p>=895<br/>unique<br/>items</p>   |
| <b>CINAHL<br/>(Ebsco)</b>                | <p>Microplastic* OR nanoplastic* OR micro-plastic* OR nano-plastic* OR "Plastic resin" OR "plastic particulate*" OR "plastic particle*" OR "plastic waste" OR "plastic pollution" OR microbead* OR micro-bead*</p> <p>AND</p> <p>Ingest* OR eat OR drink* OR "potable water" OR "bottled water" OR "water supply" OR "tap water" OR "well water" OR "food supply" OR "food microbiology" OR "food contamination" OR foods OR crops OR soil OR diet* OR absorb* OR absorption OR air*</p>                                                                                                                                                                                                                                                             | 1/21/2020 | <p>41</p> <p>-13<br/>duplicates</p> <p>=28<br/>unique<br/>items</p>       |

|                                                    |                                                                                                                                                                                                                                                                                                                                                                                                                                                                                                                                                                                                                                                                                                                                                                                 |           |                                                                |
|----------------------------------------------------|---------------------------------------------------------------------------------------------------------------------------------------------------------------------------------------------------------------------------------------------------------------------------------------------------------------------------------------------------------------------------------------------------------------------------------------------------------------------------------------------------------------------------------------------------------------------------------------------------------------------------------------------------------------------------------------------------------------------------------------------------------------------------------|-----------|----------------------------------------------------------------|
|                                                    | OR inhalation OR inhale* OR respirat* OR breath* OR lung* OR expos* OR consume* OR consumption OR derma* OR skin OR cosmetic* OR consumer* OR contamination OR concentration OR health OR illness* OR disease*<br><br>Exclude Medline records                                                                                                                                                                                                                                                                                                                                                                                                                                                                                                                                   |           |                                                                |
| <b>GreenFile (Ebsco)</b>                           | Microplastic* OR nanoplastic* OR micro-plastic* OR nano-plastic* OR "Plastic resin" OR "plastic particulate*" OR "plastic particle*" OR "plastic waste" OR "plastic pollution" OR microbead* OR micro-bead*<br><br>AND<br><br>Ingest* OR eat OR drink* OR "potable water" OR "bottled water" OR "water supply" OR "tap water" OR "well water" OR "food supply" OR "food microbiology" OR "food contamination" OR foods OR crops OR soil OR diet* OR absorb* OR absorption OR air* OR inhalation OR inhale* OR respirat* OR breath* OR lung* OR expos* OR consume* OR consumption OR derma* OR skin OR cosmetic* OR consumer* OR contamination OR concentration OR health OR illness* OR disease*                                                                                | 1/21/2020 | 1428<br><br>-753<br>duplicates<br><br>=675<br>unique<br>items  |
| <b>Environmental Science Collection (ProQuest)</b> | TI,AB(Microplastic* OR nanoplastic* OR micro-plastic* OR nano-plastic* OR "Plastic resin" OR "plastic particulate*" OR "plastic particle*" OR "plastic waste" OR "plastic pollution" OR microbead* OR micro-bead*)<br><br>AND<br><br>TI,AB(Ingest* OR eat OR drink* OR "potable water" OR "bottled water" OR "water supply" OR "tap water" OR "well water" OR "food supply" OR "food microbiology" OR "food contamination" OR foods OR crops OR soil OR diet* OR absorb* OR absorption OR air* OR inhalation OR inhale* OR respirat* OR breath* OR lung* OR expos* OR consume* OR consumption OR derma* OR skin OR cosmetic* OR consumer* OR contamination OR concentration OR health OR illness* OR disease*)                                                                  | 1/21/2020 | 2293<br><br>-1547<br>duplicates<br><br>=746<br>unique<br>items |
| <b>Scopus</b>                                      | TITLE-ABS-KEY(Microplastic* OR nanoplastic* OR micro-plastic* OR nano-plastic* OR "Plastic resin" OR "plastic particulate*" OR "plastic particle*" OR "plastic waste" OR "plastic pollution" OR microbead* OR micro-bead*) AND TITLE-ABS-KEY(Ingest* OR eat OR drink* OR "potable water" OR "bottled water" OR "water supply" OR "tap water" OR "well water" OR "food supply" OR "food microbiology" OR "food contamination" OR foods OR crops OR soil OR diet* OR absorb* OR absorption OR air* OR inhalation OR inhale* OR respirat* OR breath* OR lung* OR expos* OR consume* OR consumption OR derma* OR skin OR cosmetic* OR consumer* OR contamination OR concentration OR health OR illness* OR disease*) AND (INDEXTERMS(human*) OR KEY(human*)) AND NOT INDEX(medline) | 1/21/2020 | 194<br><br>-134<br>duplicates<br><br>=60<br>unique<br>items    |

**Table S1.** Publications identified in scoping review by year (1974–2020), category, and publication type

| Year      | Category              | Journal article | Review | Poster | Textbook passage | Total |
|-----------|-----------------------|-----------------|--------|--------|------------------|-------|
| 1974–2010 | Environmental         | 5               | 1      | 0      | 0                | 6     |
| 1974–2010 | Adsorption/Absorption | 1               | 0      | 0      | 0                | 1     |

| <b>Year</b>      | <b>Category</b>              | <b>Journal article</b> | <b>Review</b> | <b>Poster</b> | <b>Textbook passage</b> | <b>Total</b> |
|------------------|------------------------------|------------------------|---------------|---------------|-------------------------|--------------|
| <b>1974–2010</b> | <b>Human exposure</b>        | 0                      | 0             | 0             | 0                       | 0            |
| <b>2010</b>      | <b>Environmental</b>         | 1                      | 0             | 0             | 0                       | 1            |
| <b>2010</b>      | <b>Adsorption/Absorption</b> | 0                      | 0             | 0             | 0                       | 0            |
| <b>2010</b>      | <b>Human exposure</b>        | 0                      | 0             | 0             | 0                       | 0            |
| <b>2011</b>      | <b>Environmental</b>         | 3                      | 2             | 0             | 0                       | 5            |
| <b>2011</b>      | <b>Adsorption/Absorption</b> | 1                      | 0             | 0             | 0                       | 1            |
| <b>2011</b>      | <b>Human exposure</b>        | 0                      | 0             | 0             | 0                       | 0            |
| <b>2012</b>      | <b>Environmental</b>         | 2                      | 0             | 0             | 0                       | 2            |
| <b>2012</b>      | <b>Adsorption/Absorption</b> | 3                      | 0             | 0             | 0                       | 3            |
| <b>2012</b>      | <b>Human exposure</b>        | 0                      | 0             | 0             | 0                       | 0            |
| <b>2013</b>      | <b>Environmental</b>         | 4                      | 0             | 0             | 0                       | 4            |
| <b>2013</b>      | <b>Adsorption/Absorption</b> | 4                      | 0             | 0             | 0                       | 4            |
| <b>2013</b>      | <b>Human exposure</b>        | 0                      | 0             | 0             | 0                       | 0            |
| <b>2014</b>      | <b>Environmental</b>         | 5                      | 1             | 0             | 0                       | 6            |
| <b>2014</b>      | <b>Adsorption/Absorption</b> | 2                      | 1             | 0             | 0                       | 3            |
| <b>2014</b>      | <b>Human exposure</b>        | 0                      | 0             | 0             | 0                       | 0            |
| <b>2015</b>      | <b>Environmental</b>         | 22                     | 5             | 0             | 0                       | 27           |
| <b>2015</b>      | <b>Adsorption/Absorption</b> | 3                      | 1             | 0             | 0                       | 4            |
| <b>2015</b>      | <b>Human exposure</b>        | 0                      | 0             | 0             | 0                       | 0            |
| <b>2016</b>      | <b>Environmental</b>         | 25                     | 7             | 0             | 0                       | 32           |
| <b>2016</b>      | <b>Adsorption/Absorption</b> | 11                     | 1             | 0             | 0                       | 12           |
| <b>2016</b>      | <b>Human exposure</b>        | 0                      | 0             | 0             | 0                       | 0            |
| <b>2017</b>      | <b>Environmental</b>         | 38                     | 10            | 1             | 0                       | 49           |
| <b>2017</b>      | <b>Adsorption/Absorption</b> | 15                     | 1             | 0             | 0                       | 16           |
| <b>2017</b>      | <b>Human exposure</b>        | 0                      | 1             | 0             | 0                       | 1            |
| <b>2018</b>      | <b>Environmental</b>         | 75                     | 22            | 0             | 1                       | 98           |
| <b>2018</b>      | <b>Adsorption/Absorption</b> | 22                     | 0             | 0             | 0                       | 22           |

| Year          | Category              | Journal article | Review          | Poster       | Textbook passage | Total         |
|---------------|-----------------------|-----------------|-----------------|--------------|------------------|---------------|
| 2018          | Human exposure        | 1               | 1               | 1            | 0                | 3             |
| 2019          | Environmental         | 124             | 35              | 0            | 0                | 159           |
| 2019          | Adsorption/Absorption | 45              | 7               | 0            | 0                | 52            |
| 2019          | Human exposure        | 5               | 0               | 0            | 0                | 5             |
| 2020          | Environmental         | 34              | 12              | 0            | 0                | 46            |
| 2020          | Adsorption/Absorption | 8               | 0               | 0            | 0                | 8             |
| 2020          | Human exposure        | 0               | 2               | 0            | 0                | 2             |
| 1974–<br>2020 | Total papers (%)      | 459<br>(80.25%) | 110<br>(19.23%) | 2<br>(0.35%) | 1<br>(0.17%)     | 572<br>(100%) |
